# Supplementary material
Source: Springer Nature journal article supplement (https://www.springermedizin.de/resource/supplementary/13063_2014_2397_MOESM1_ESM.pdf/9622012)

# The Berlin Transition Program

## *Case-management*

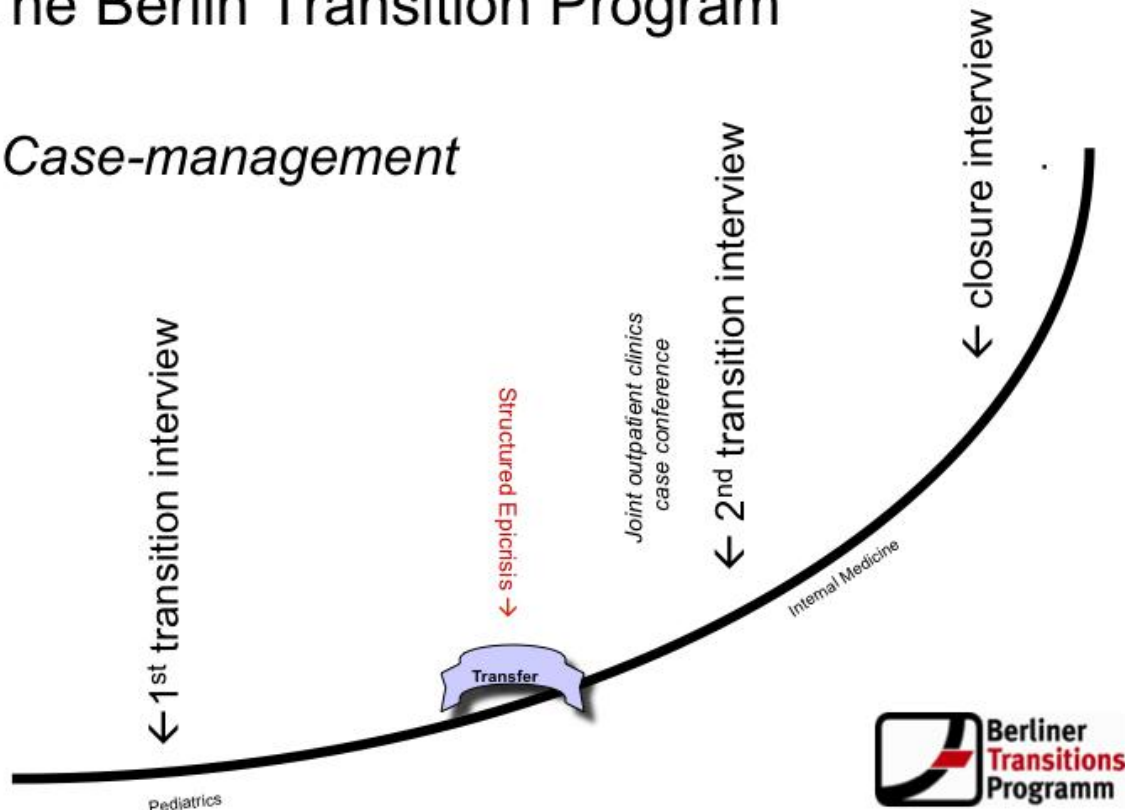

Supplement: MOESM1 [file 9622012]
